# Supplementary material for: Self-reported variations in ejaculatory latency time in premature ejaculation: insights into contextual and behavioural factors
Source: Research Square preprint supplement (doi:10.21203/rs.3.rs-7074348/v1), 2025-07-23
Supplement: Supplementary file 1 [file 82415790d0122c3a6e91347a.docx]

|  | PE patients (n = 119) (mean ± SD) |
| --- | --- |
| Age | 30.7 ± 6.3 |
| BMI (kg/m2) | 23.4 ± 3.7 |
| Marital status |  |
| - married - in a relationship (cohabiting) - in a relationship (not cohabiting) - divorced - single | 57 (47.9%) 16 (13.4%) 41 (34.5%) 1 (0.8%)  4 (3.4%) |
| Educational background   - PhD - Master degree - Bachelor Degree - Junior college - Senior High School - Junior High School - Primary School | 1 (0.8%)  8 (6.7%) 32 (26.9%) 41 (34.5%) 14 (11.8%) 19 (16%) 4 (3.4%) |

**Table 1**. Sociodemographic characteristics of the sample. PE = premature ejaculation; SD = standard deviation; BMI= body mass index; PhD = professional doctoral degree.

|  | PE patients (n = 119) (mean ± SD) |
| --- | --- |
| Age at first sexual intercourse | 22.7 ± 4.1 |
| Frequency of sexual intercourse/month | 5.5 ± 3.8 |
| Frequency of masturbation/month | 2.5 ± 2.7 |
| PEDT | 15.3 ± 2.6 |
| IIEF – 6 | 27.2 ± 3.3 |

**Table 2.** Sexual characteristics of the sample. PE= premature ejaculation; SD =standard deviation; PEDT = Premature Ejaculation Diagnostic Tool; IIEF-6 = International Index of Erectile Dysfunction – 6

| **Q1. At what time do you usually have intercourse?** | Answers (n.%) | **Q2. At which of the following times do you experience the longest ejaculation latency during intercourse?** | Answers (n.%) |
| --- | --- | --- | --- |
| Early morning (00:00–06:00) | 16 (3.4%) | Early morning (00:00–06:00) | 1 (0.8%) |
| Morning (06:00–08:00) | 0 (0%) | Morning (06:00–08:00) | 16 (13.4%) |
| Late morning (08:00–12:00) | 2 (1.7%) | Late morning (08:00–12:00) | 11 (9.2%) |
| Noon (12:00–13:00) | 0 (0%) | Noon (12:00–13:00) | 0 (0%) |
| Afternoon (13:00–18:00) | 3 (2.5%) | Afternoon (13:00–18:00) | 2 (1.7%) |
| Early evening (18:00–19:00) | 1 (0.8%) | Early evening (18:00–19:00) | 0 (0%) |
| **Night (19:00–24:00)** | **90 (75.6%)** ***** | Night (19:00–24:00) | 3 (2.5%) |
| Anytime – not fixed | 7 (5.9%) | **About the same – unclear** | **86 (72.3%)*** |
| **Q3. At which of the following times do you experience the shortest ejaculation latency during intercourse?** | Answers (n.%) | **Q4. After waking up in the morning, is your ejaculation latency during intercourse longer than it was before sleeping?** |  |
| Early morning (00:00–06:00) | 3 (2.5%) | Yes. longer than it was before sleeping | 39 (32.8%) |
| Morning (06:00–08:00) | 0 (0%) | No. shorter than it was before sleeping | 2 (1.7%) |
| Late morning (08:00–12:00) | 2 (1.7%) | **About the same – unclear** | **77 (64.7%)*** |
| Noon (12:00–13:00) | 1 (0.8%) |  |  |
| Afternoon (13:00–18:00) | 0 (0%) |  |  |
| Early evening (18:00–19:00) | 1 (0.8%) |  |  |
| Night (19:00–24:00) | 23 (19.3%) |  |  |
| **About the same - unclear** | **89 (74.8 %)*** |  |  |

**Table 3.** Questions related to the timing of the day and its influence over ejaculation latency. * p<0.01

| **Q6. Which sexual position results in the longest ejaculation latency for you?** | Answers (n. %) | **Q7. Which sexual position results in the shortest ejaculation latency for you?** | Answers (n. %) |
| --- | --- | --- | --- |
| 1. **Face-to-face/man on top** | 41 (34.5%) | **1. Face-to-face/man on top** | 28 (23.5%) |
| 1. **Face-to-face/woman on top** | 25 (21%) | **2. Face-to-face/woman on top** | 27 (22.7%) |
| 1. **Sitting/face-to-face** | 4 (3.4%) | **3. Sitting/face-to-face** | 0 (0%) |
| 1. **Kneeling/rear entry** | 17 (14.3%) | **4. Kneeling/rear entry** | 32 (26.9%) |
| 1. **Others** | 14 (11.8%) | **5. Others** | 14 (11.8%) |
| 1. **No difference** | 18 (15.1%) | **6. No difference** | 18 (15.1%) |
| **Total** | 119 (100%) | **Total** | 119 (100%) |

**Table 4.** Participants' answers regarding sexual position.
